# Supplementary material for: International workshop on “professionalism in the practice of medicine- where are we now?”
Source: Springer Nature journal article supplement (doi:10.1186/s13584-017-0144-5), 2017-04-03
Supplement: MOESM1 [file 12196438]

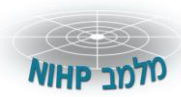

# THE ISRAEL NATIONAL INSTITUTE FOR HEALTH POLICY RESEARCH

## International Workshop Professionalism in the Practice of Medicine – Where are we now? December 11-12, 2016

**Sunday, December 11<sup>th</sup>, 2016**

09:00-10:00 *Gathering & Welcome Coffee*

### 10:00-13:00 **OPENING SESSION AND GREETINGS**

**Chair:** Orly Manor, *Chair, Board of Directors, NIHP*

**Moshe Bar Siman Tov,** *Director General, Ministry of Health*

**Workshop Chair and Introductory Lecture:** Ora Paltiel - *Professionalism: What are the issues and why do they need to be discussed?* *Hadassah-Hebrew University*

#### **Defining Professionalism: International Views**

**Pali Hungin** - *Professionalism: Coping with the changing role of the doctor,*  
*President, BMA, UK*

**Jo Shapiro** - *Professionalism: Culture of trust as a key to safety and quality,*  
*Brigham and Women's Hospital, Harvard University, USA*

**Shimon Glick** - *Professionalism: Changing views in time and space,*  
*Ben-Gurion University*

**Discussion**

13:00-14:00 *Lunch*

### 14:00-16:10 **Professionalism as a Learned Competency**

**Chair:** Shmuel Reis, *Hebrew University-Hadassah*

**Shiphra Ginsburg** - *Fostering professionalism in the education environment,*  
*Mount Sinai Hospital, University of Toronto, Canada*

**Ruti Stashefsky Margalit** - *Simulation as a tool to enhance medical professionalism*  
*Messer-Chaim Sheba Medical Center*

**Panel: Representatives of Israeli faculties of medicine - How do we/should we train physicians in Israel in professionalism?**

**Chair:** Shiphra Ginsburg, *Mount Sinai Hospital, University of Toronto, Canada*  
**Peter Gilbey-** *Galilee, Bar-Ilan University, Shimon Glick-* *Ben-Gurion University,*  
**Nathaniel Laor-** *Tel-Aviv University, Lior Lowenstein-* *Rambam Health Care Campus,*  
**Shmuel Reis-** *Hebrew University-Hadassah*

**Discussion**

16:10-16:30 *Coffee Break*

### 16:30-18:00 **Complaints, Complaints, Complaints. Do they Enhance Professionalism?**

**Chair:** Avi Israeli, *Ministry of Health*

**Shimon Glick, Chaim Hershko, Boaz Lev** - *Former and current ombudsmen,*  
*Ministry of Health*

**Panel: Physicians representing HMO's**

**Yair Birnbaum-** *Clalit, Avi Porath-* *Maccabi, Gershon S Segal-* *Leumit,*  
**Yoav Yehezkelli-** *Meuhedet*

19:45 *Dinner & Evening Program*

**Nissan Perez** - *Early Photography & Medicine, A brief history,*  
*Photography historian and curator*

**Monday, December 12<sup>th</sup>, 2016**

**09:00-10:30 Professional Conduct: Regulation or Self-Regulation. The Carrot and Stick**

**Chair:** Drorith Hochner-Celnikier, *Hadassah University Hospital*

**David Katz** - *Professionalism and professional self-regulation: The UK experience, University College London, UK*

**Tami Karni** - *The IMA: How it handles "lapses" in professionalism, Ethics bureau, IMA*

**Discussant:** Jo Shapiro - Alternative ways of handling unprofessional behavior

**Discussion**

*10:30-11:00 Coffee Break*

**11:00-13:00 Professionalism in the Digital Age**

**Chair:** Haim Bitterman, *Assuta Ashdod Public Hospital*

**Shmuel Reis** - *Professionalism in the digital age: Required additional competencies, and how they should be acquired, Hebrew University-Hadassah*

**Orit Karnieli-Miller** - *Our undivided attention? Challenges to professionalism in day-to-day medical encounters, Tel-Aviv University*

**Discussant:** Pali Hungin

**Panel: Generation X, Y and Z- How we differ from our teachers and our students**

**Chair:** Ziv Gil, *Technion, Israel Institute of Technology*

**Sameer Kassem**- *Carmel Hospital,*

**Orna Reichman**- *Shaare Zedek Medical Center,*

**Rotem Tellem**- *Tel-Aviv Sourasky Medical Center*

**Discussion**

*13:00-14:00 Lunch*

**14:00-16:30 CLOSING SESSION: THEORY TO PRACTICE**

**Chair:** Ora Paltiel, *Hadassah-Hebrew University*

**Vignettes**

**Roundtable Chairs:**

**Amnon Lahad**- *Hebrew University, Dafna Meitar*- *Tel-Aviv University,*

**Dorith Shaham**, *Hadassah-Hebrew University*

**Reporters:**

**A Mark Clarfield**- *Ben-Gurion University, Mordechai Muszkat*- *Hadassah Mt Scopus,*

**Reena Rosenberg**- *Clalit*

**Wrap up:** Shiphra Ginsburg

*Coffee to Go*
